# Supplementary material for: CRISPR-Cas9-Edited Tacrolimus-Resistant Antiviral T Cells for Advanced Adoptive Immunotherapy in Transplant Recipients
Source: PubMed Central journal article supplement — Mol Ther. 2020 Sep 8;29(1):32–46. doi: 10.1016/j.ymthe.2020.09.011 (PMC7791012; doi:10.1016/j.ymthe.2020.09.011), 2020-09-08
Supplement: mmc1.pdf [file mmc1.pdf]

YMTHE, Volume 29

## **Supplemental Information**

### **CRISPR-Cas9-Edited Tacrolimus-Resistant**

### **Antiviral T Cells for Advanced Adoptive**

### **Immunotherapy in Transplant Recipients**

**Leila Amini, Dimitrios Laurin Wagner, Uta Rössler, Ghazaleh Zarrinrad, Livia Felicitas Wagner, Tino Vollmer, Désirée Jacqueline Wending, Uwe Kornak, Hans-Dieter Volk, Petra Reinke, and Michael Schmueck-Henneresse**

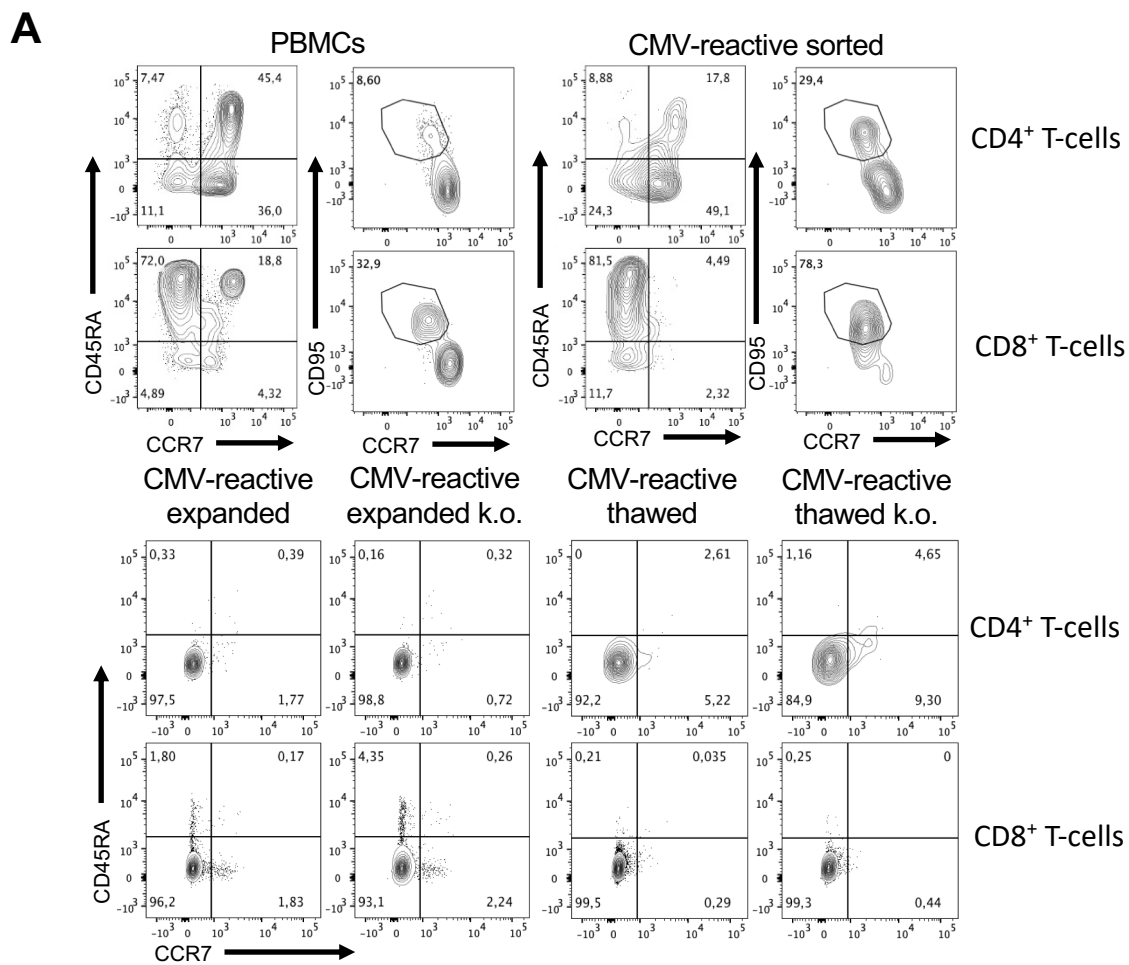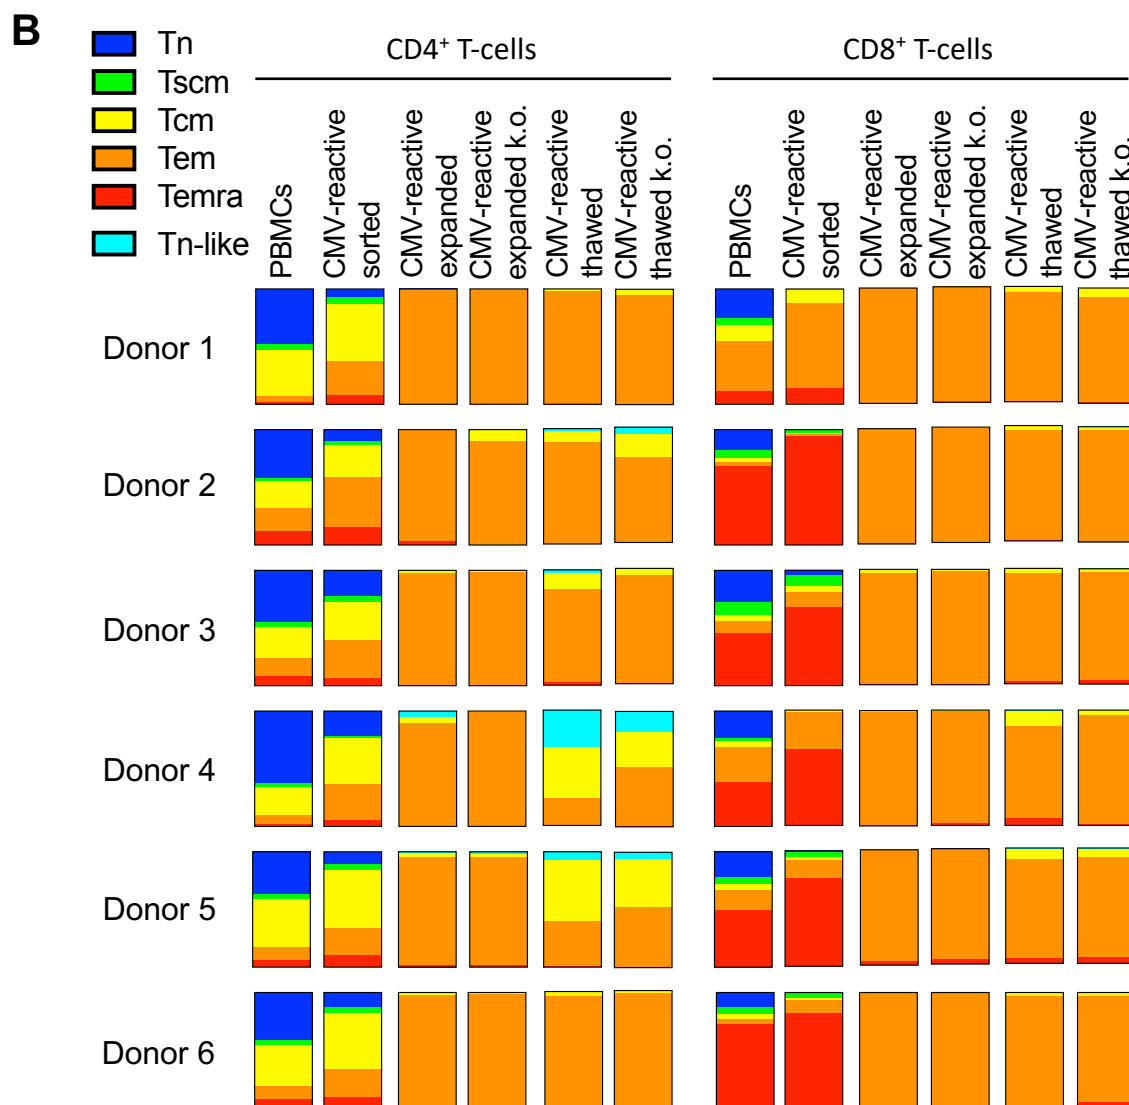

**Supplementary Figure 1: T-cell memory subsets in the starting material, sorted CMV-specific T-cells and the expanded and thawed T-cell products.**

(A) Representative flow cytometric dot plots illustrating T-cell memory subsets in the different populations indicated above the plots.

(B) Distribution of CD4<sup>+</sup> (left panel) and CD8<sup>+</sup> (right panel) T-cell memory subsets in the different populations indicated for each donor: T<sub>N</sub> = naïve T-cells (CCR7<sup>+</sup>, CD45RA<sup>+</sup>, CD95<sup>-</sup>), T<sub>SCM</sub> = stem cell memory T-cells (CCR7<sup>+</sup>, CD45RA<sup>+</sup>, CD95<sup>+</sup>), T<sub>CM</sub> = central memory T-cells (CCR7<sup>+</sup> CD45RA<sup>-</sup>), T<sub>EM</sub> = effector memory T-cells (CCR7<sup>-</sup> CD45RA<sup>-</sup>), T<sub>EMRA</sub> = CD45RA-expressing effector memory T-cells (CCR7<sup>-</sup> CD45RA<sup>+</sup>), T<sub>N-like</sub> = expanded naïve-like T-cells (CCR7<sup>+</sup> CD45RA<sup>+</sup>).
